# Supplementary material for: III-nitride photonic cavities
Source: publisher site journal article supplement (doi:10.1515/nanoph-2019-0442), 2020-01-15
Supplement: Supplementary file 4 [file Copyright_Fig2.pdf › Copyrigths/Copyright_Fig2.pdf]

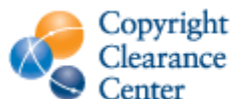**RightsLink®**[Home](#)[Create Account](#)[Help](#)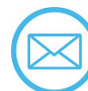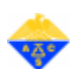**ACS Publications**  
Most Trusted. Most Cited. Most Read.

**Title:** Blue Microlasers Integrated on a Photonic Platform on Silicon

**Author:** Farsane Tabataba-Vakili, Laetitia Doyennette, Christelle Brimont, et al

**Publication:** ACS Photonics

**Publisher:** American Chemical Society

**Date:** Sep 1, 2018

Copyright © 2018, American Chemical Society

**LOGIN**

If you're a [copyright.com user](#), you can login to RightsLink using your copyright.com credentials.

Already a [RightsLink user](#) or want to [learn more?](#)

**PERMISSION/LICENSE IS GRANTED FOR YOUR ORDER AT NO CHARGE**

This type of permission/license, instead of the standard Terms & Conditions, is sent to you because no fee is being charged for your order. Please note the following:

- Permission is granted for your request in both print and electronic formats, and translations.
- If figures and/or tables were requested, they may be adapted or used in part.
- Please print this page for your records and send a copy of it to your publisher/graduate school.
- Appropriate credit for the requested material should be given as follows: "Reprinted (adapted) with permission from (COMPLETE REFERENCE CITATION). Copyright (YEAR) American Chemical Society." Insert appropriate information in place of the capitalized words.
- One-time permission is granted only for the use specified in your request. No additional uses are granted (such as derivative works or other editions). For any other uses, please submit a new request.

If credit is given to another source for the material you requested, permission must be obtained from that source.

[BACK](#)[CLOSE WINDOW](#)

Copyright © 2019 [Copyright Clearance Center, Inc.](#) All Rights Reserved. [Privacy statement](#). [Terms and Conditions](#).  
Comments? We would like to hear from you. E-mail us at [customercare@copyright.com](mailto:customercare@copyright.com)
