# Supplementary material for: III-nitride photonic cavities
Source: publisher site journal article supplement (doi:10.1515/nanoph-2019-0442), 2020-01-15
Supplement: Supplementary file 6 [file Copyright_Fig5.pdf › Copyrigths/Copyright_Fig5.pdf]

## Butte Raphael

---

**De:** Permissions <permissions@iopublishing.org>  
**Envoyé:** lundi, 28 octobre 2019 12:52  
**À:** Butte Raphael  
**Objet:** Re: Request permission APEX 5 126502 (2012)

Dear Raphaël,

Thank you for your request to reuse JSAP material in “III-nitride photonic cavities” to be published by De Gruyter.

Regarding:

**Figure 1 from Fabrication of AlGa<sub>N</sub> Two-Dimensional Photonic Crystal Nanocavities by Selective Thermal Decomposition of GaN**

We are happy to grant permission for the use you request, provided:

- The Copyright Policy of JSAP is followed <https://www.jsap.or.jp/english/copyright-policy>
- The article is cited as a reference
- The copyright line including year of publication is added to the reproduced content (at the end of the figure captions):
  - For articles published from year 2000 onwards - Copyright (2012) The Japan Society of Applied Physics

This does not apply to any material/figure which is credited to another source in the publication or has been obtained from a third party. Express permission for such materials/figures must be obtained from the copyright owner.

Kind regards,

Sophie

### Copyright & Permissions Team

Sophie Brittain - Rights & Permissions Assistant

Harriet Shaw - Legal Adviser

Contact Details

E-mail: [permissions@iop.org](mailto:permissions@iop.org)

For further information about copyright and how to request permission:

<https://publishingsupport.iopscience.iop.org/copyright-journals/>

See also: <https://publishingsupport.iopscience.iop.org/>

Please see our Author Rights Policy <https://publishingsupport.iopscience.iop.org/author-rights-policies/>

**Please note:** We do not provide signed permission forms as a separate attachment. Please print this email and provide it to your publisher as proof of permission. **Please note:** Any statements made by IOP Publishing to the effect that authors do not need to get permission to use any content where IOP Publishing is not the publisher is not intended to constitute any sort of legal advice. Authors must make their own decisions as to the suitability of the content they are using and whether they require permission for it to be published within their article.

---

**From:** Butte Raphael <raphael.butte@epfl.ch>  
**Sent:** 28 October 2019 11:28  
**To:** permissions@iop.org <permissions@iop.org>  
**Subject:** Request permission APEX 5 126502 (2012)

To whom it may concern,

Hereby, I request the permission to reuse Figure 1 of the article by M. Arita, S. Kako, S. Iwamoto, and Y. Arakawa, "Fabrication of AlGaIn two-dimensional photonic crystal nanocavities by selective thermal decomposition of GaN," Appl. Phys. Express 5, 126502 (2012), <https://iopscience.iop.org/article/10.1143/APEX.5.126502>. This figure will appear in a review article authored by Prof. Nicolas Grandjean and myself entitled "III-nitride photonic cavities" that should appear in a forthcoming issue (most likely during the 1<sup>st</sup> quarter of year 2020) of the journal "Nanophotonics" published by De Gruyter.

I look forward to hearing from you.

Yours sincerely,

Raphaël Butté

**Dr. Raphaël Butté**

**Senior Scientist**

Institute of Physics (IPhys)

Laboratory of Advanced Semiconductors for Photonics and Electronics (LASPE)

**FSB-IPHYS-LASPE**

Station 6

Office: **CH A3 465**

**Ecole Polytechnique Fédérale de Lausanne**

CH-1015 Lausanne

Switzerland

Phone: +41(0)21 693 33 57

Mobile: +41 (0)78 620 36 61

E-mail: [raphael.butte@epfl.ch](mailto:raphael.butte@epfl.ch)

<http://personnes.epfl.ch/raphael.butte>

legal and finance teams, which have changed to @ioplegal.org and @iopfinance.org respectively.

This email (and attachments) are confidential and intended for the addressee(s) only. If you are not the intended recipient please immediately notify the sender, permanently and securely delete any copies and do not take action with it or in reliance on it. Any views expressed are the author's and do not represent those of IOPP, except where specifically stated. IOPP takes reasonable precautions to protect against viruses but accepts no responsibility for loss or damage arising from virus infection. For the protection of IOPP's systems and staff; emails are scanned automatically.

**IOP Publishing Limited**

Registered in England under Registration No 00467514.

Registered Office: Temple Circus, Bristol BS1 6HG England

Your privacy is important to us. For information about how IOPP uses your personal data, please see our [Privacy Policy](#)
