# Supplementary material for: III-nitride photonic cavities
Source: publisher site journal article supplement (doi:10.1515/nanoph-2019-0442), 2020-01-15
Supplement: Supplementary file 7 [file Copyright_Fig7.pdf › Copyrigths/Copyright_Fig7.pdf]

## Butte Raphael

---

**De:** pubscopyright <copyright@osa.org>  
**Envoyé:** mercredi, 6 novembre 2019 20:57  
**À:** Butte Raphael; pubscopyright  
**Objet:** RE: Request permission Opt. Lett. 36, 2203 (2011),  
<https://doi.org/10.1364/OL.36.002203>.

Dear Dr. Raphaël Butté,

Thank you for contacting The Optical Society.

For the use of figure 3 from M. Mexis, S. Sargent, T. Guillet, C. Brimont, T. Bretagnon, B. Gil, F. Semond, M. Leroux, D. Néel, S. David, X. Chécoury, and P. Boucaud, "High quality factor nitride-based optical cavities: microdisks with embedded GaN/Al(Ga)N quantum dots," Opt. Lett. 36, 2203-2205 (2011):

OSA considers your requested use of its copyrighted material to be Fair Use under United States Copyright Law. It is requested that a complete citation of the original material be included in any publication.

While your publisher should be able to provide additional guidance, OSA prefers the below citation formats:

For citations in figure captions:

[Reprinted/Adapted] with permission from [ref #] © The Optical Society. (Please include the full citation in your reference list)

For images without captions:

Journal Vol. #, first page (year published) An example: Opt. Lett. 36, 2203 (2011)

Please let me know if you have any questions.

Kind Regards,

Rebecca Robinson

Rebecca Robinson  
November 6, 2019  
Authorized Agent, The Optical Society

**The Optical Society (OSA)**  
2010 Massachusetts Ave., NW  
Washington, DC 20036 USA  
[www.osa.org](http://www.osa.org)

Reflecting a Century of Innovation

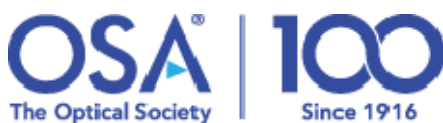

---

**From:** Butte Raphael <raphael.butte@epfl.ch>  
**Sent:** Monday, October 28, 2019 9:45 AM

**To:** pubscopyright <copyright@osa.org>

**Subject:** Request permission Opt. Lett. 36, 2203 (2011), <https://doi.org/10.1364/OL.36.002203>.

To whom it may concern,

Hereby, I request the permission to reuse Figure 3 of the article by M. Mexis, S. Sergent, T. Guillet et al., "High quality factor nitride-based optical cavities: microdisks with embedded GaN/Al(GaN) quantum dots," Opt. Lett. 36, 2203 (2011), <https://doi.org/10.1364/OL.36.002203>.

This figure will appear in a review article authored by Prof. Nicolas Grandjean and myself entitled "III-nitride photonic cavities" that should appear in a forthcoming issue (most likely during the 1<sup>st</sup> quarter of year 2020) of the journal "Nanophotonics" published by De Gruyter.

I look forward to hearing from you.

Yours sincerely,

Raphaël Butté

**Dr. Raphaël Butté**

**Senior Scientist**

Institute of Physics (IPhys)

Laboratory of Advanced Semiconductors for Photonics and Electronics (LASPE)

**FSB-IPHYS-LASPE**

Station 6

Office: CH A3 465

**Ecole Polytechnique Fédérale de Lausanne**

CH-1015 Lausanne

Switzerland

Phone: +41(0)21 693 33 57

Mobile: +41 (0)78 620 36 61

E-mail: [raphael.butte@epfl.ch](mailto:raphael.butte@epfl.ch)

<http://personnes.epfl.ch/raphael.butte>
