# Supplementary material for: III-nitride photonic cavities
Source: publisher site journal article supplement (doi:10.1515/nanoph-2019-0442), 2020-01-15
Supplement: Supplementary file 11 [file Copyright_Figs15and17_authors_approval.pdf › Copyrigths/Copyright_Figs15and17_authors_approval.pdf]

## Butte Raphael

---

**De:** Christopher Gies <gies@itp.uni-bremen.de>  
**Envoyé:** mardi, 29 octobre 2019 16:56  
**À:** Butte Raphael  
**Objet:** Re: Permission request

Dear Raphaël,

With pleasure, I am very happy that you will use our work for your review article. I am looking forward to reading it.

All the best  
Christopher

Zitat von Butte Raphael <[raphael.butte@epfl.ch](mailto:raphael.butte@epfl.ch)>:

Dear Christopher

I get in touch with you in order to obtain the permission to reuse two figures of your Phys. Rev. Appl. article (Phys. Rev. Appl. 10, 054055 (2018)) such as detailed in the attached file.

They should appear in an invited review article authored by Nicolas Grandjean and myself, which is under review and which should appear in the journal Nanophotonics at the beginning of next year.

I look forward to hearing from you.

With best regards,

Raphaël

**Dr. Raphaël Butté**

**Senior Scientist**  
Institute of Physics (IPhys)  
Laboratory of Advanced Semiconductors for Photonics and Electronics (LASPE)

**FSB-IPHYS-LASPE**  
Station 6  
Office: **CH A3 465**

**Ecole Polytechnique Fédérale de Lausanne**  
CH-1015 Lausanne  
Switzerland

Phone: +41(0)21 693 33 57  
Mobile: +41 (0)78 620 36 61  
E-mail: [raphael.butte@epfl.ch](mailto:raphael.butte@epfl.ch)

<http://personnes.epfl.ch/raphael.butte>
