# Supplementary figures and images for: III-nitride photonic cavities
Source: publisher site journal article supplement (doi:10.1515/nanoph-2019-0442), 2020-01-15

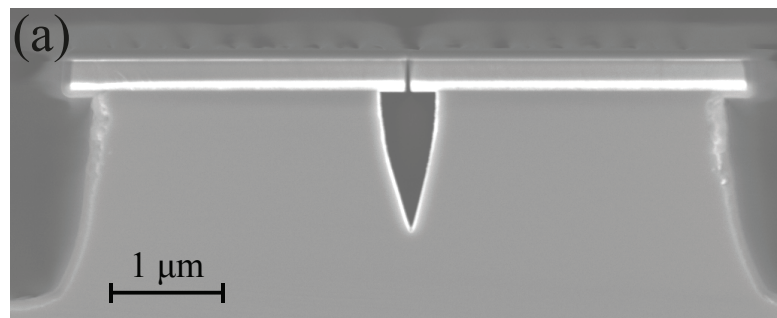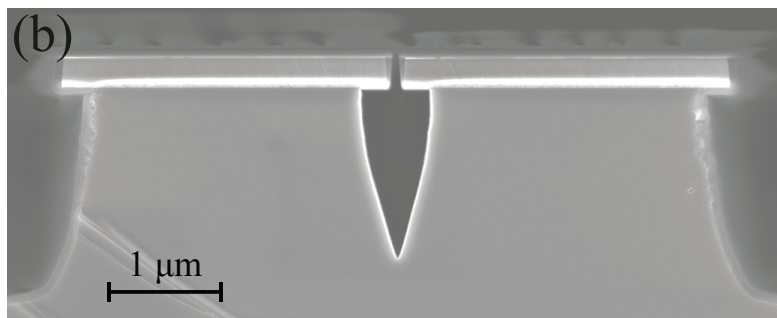

Supplement: Supplementary file 13 [file FigS1.pdf › Souce code of Supplementary Material (TEX, CLS, STY)/FigS1.pdf]

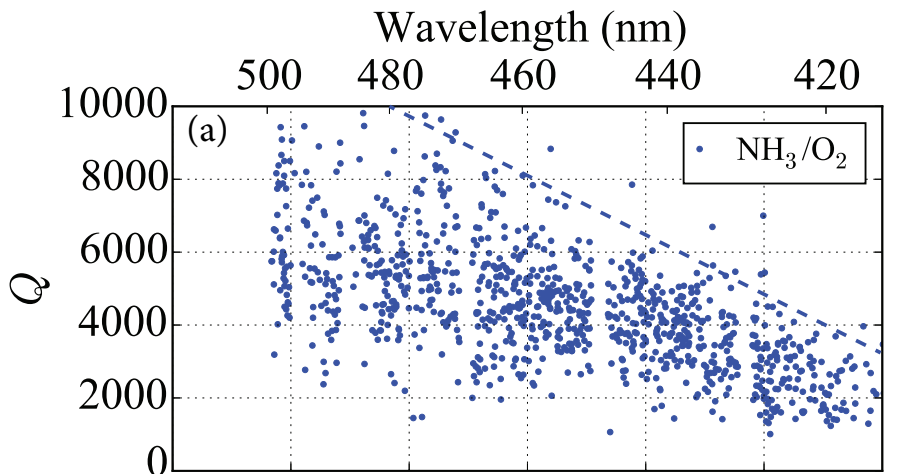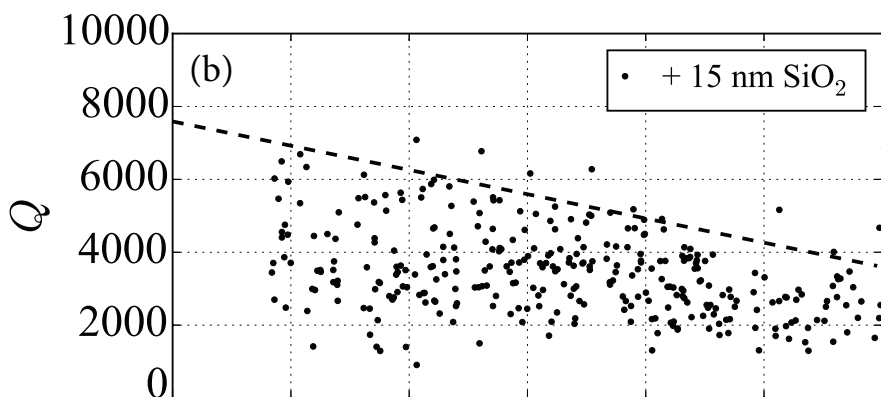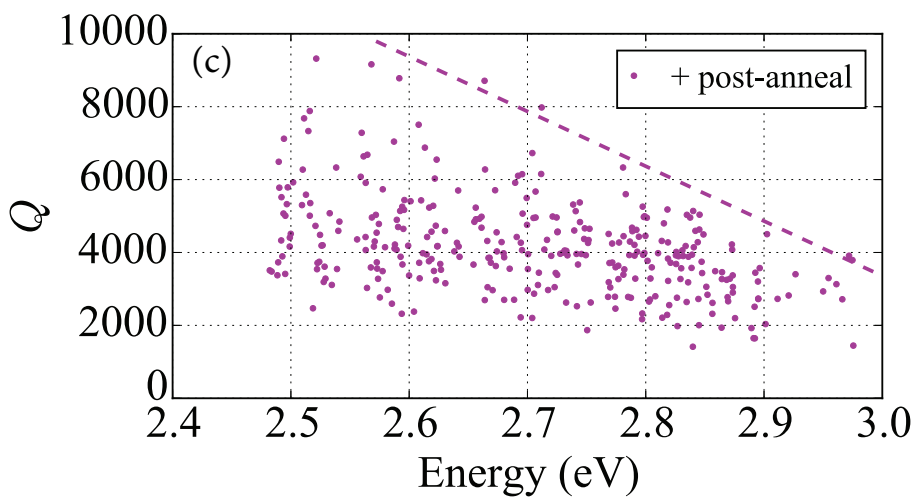

Supplement: Supplementary file 14 [file FigS2.pdf › Souce code of Supplementary Material (TEX, CLS, STY)/FigS2.pdf]

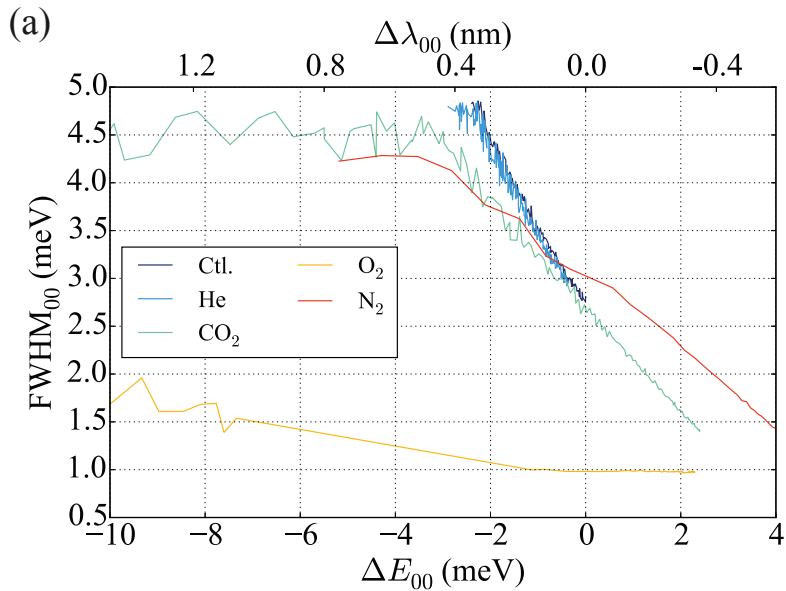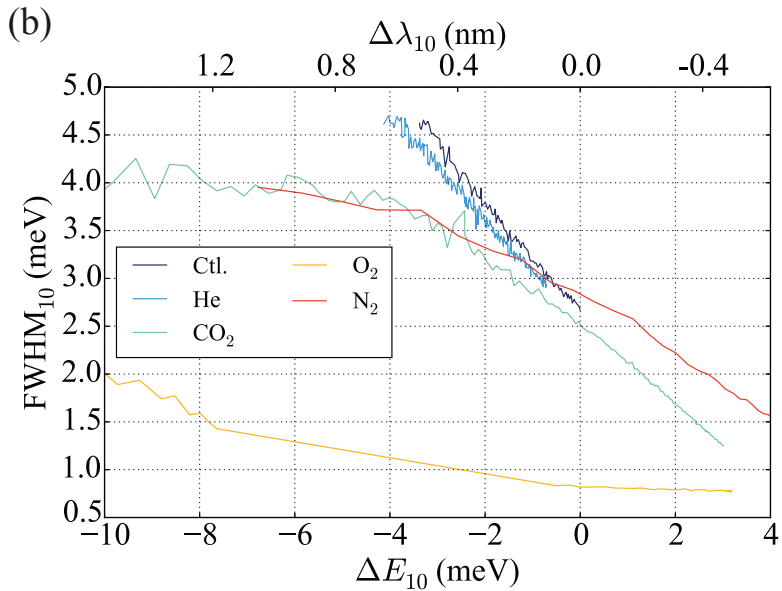

Supplement: Supplementary file 15 [file FigS3.pdf › Souce code of Supplementary Material (TEX, CLS, STY)/FigS3.pdf]
